# Supplementary material for: CENPA regulates tumor stemness in lung adenocarcinoma
Source: publisher site journal article supplement (doi:10.18632/aging.204167), 2022-07-11
Supplement: Supplementary file [file aging-v14i13-204167-supplementary-material-SD1.pdf]

**SUPPLEMENTARY FIGURE**

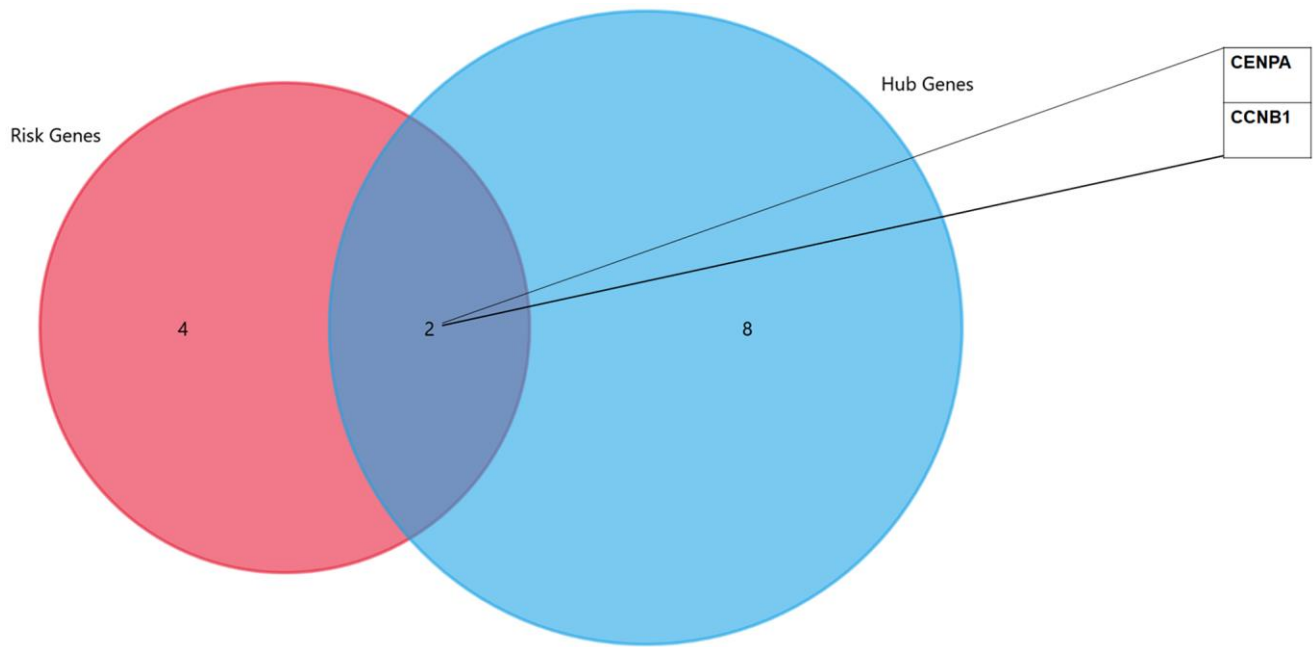

**Supplementary Figure 1. The intersection of risk genes and hub genes.**
